# Supplementary material for: Adjusting acceptor redistribution for highly efficient solvent additive-free polymer solar cells
Source: Royal Society of Chemistry journal article supplement (doi:10.1039/c6tc00911e), 2016-01-01
Supplement: c6tc00911e1.pdf [file c6tc00911e1.pdf]

## Adjusting acceptor redistribution for highly efficient solvent additive-free polymer solar cells

Jian Wang,<sup>a</sup> Fujun Zhang\*,<sup>a</sup> Qiaoshi An,<sup>a</sup> Miao Zhang,<sup>a</sup> Jian Zhang,<sup>b</sup> Weihua Tang<sup>c</sup>

<sup>a</sup> Key Laboratory of Luminescence and Optical Information, Ministry of Education, Beijing Jiaotong University, Beijing 100044, People's Republic of China

<sup>b</sup> Key Laboratory of Soft Chemistry and Functional Materials (Ministry of Education of China), Nanjing University of Science and Technology, Nanjing 210094, People's Republic of China.

<sup>c</sup> School of Materials Science and Engineering, Guilin University of Electronic Technology, Guilin 541004, People's Republic of China.

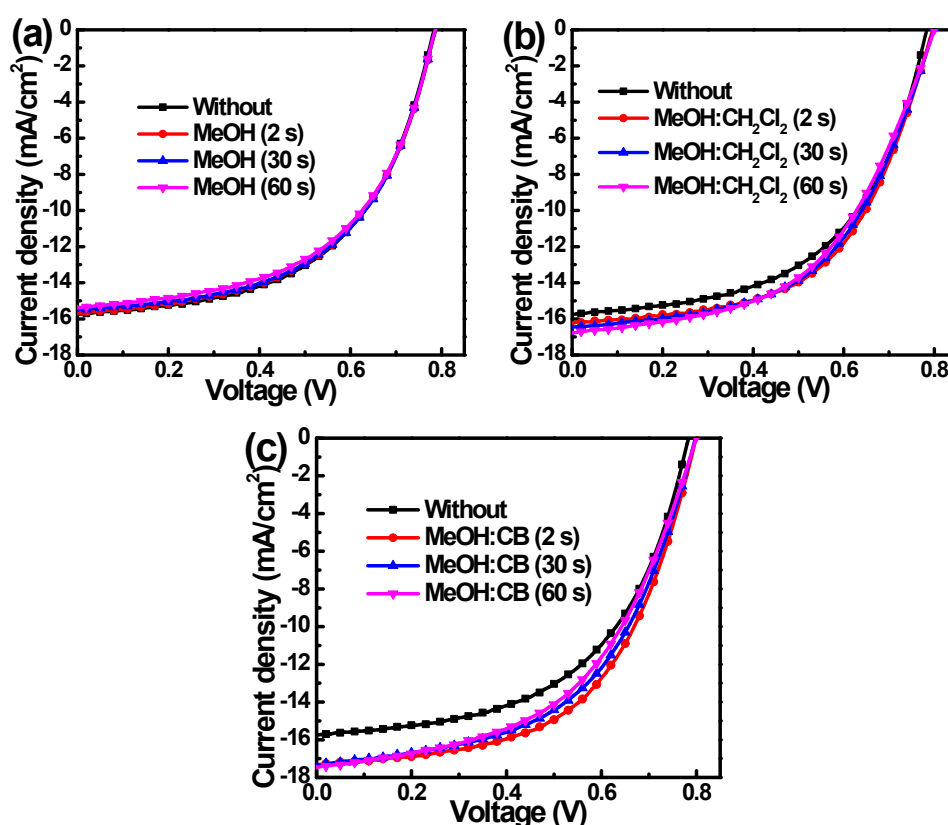

**Figure S1** The  $J$ - $V$  curves of PSCs based on active layer with different solvents soaking treatment:

(a) MeOH solvent, (b) MeOH:CH<sub>2</sub>Cl<sub>2</sub> mixed solvents and (c) MeOH:CB mixed solvents.

\* Email: [fjzhang@bjtu.edu.cn](mailto:fjzhang@bjtu.edu.cn) (Fujun) Tel: 0086-10-51684908

Table S1. The key parameters of PSCs without or with different solvents soaking treatment

| Post-treatment                                   | $J_{sc}$ (mA/cm) | $V_{oc}$ (V) | FF (%) | PCE (%) |
|--------------------------------------------------|------------------|--------------|--------|---------|
| Without                                          | 15.76            | 0.78         | 54.5   | 6.69    |
| MeOH (2 s)                                       | 15.67            | 0.79         | 53.8   | 6.66    |
| MeOH (30 s)                                      | 15.52            | 0.79         | 54.3   | 6.66    |
| MeOH (60 s)                                      | 15.39            | 0.79         | 53.7   | 6.53    |
| MeOH:CH <sub>2</sub> Cl <sub>2</sub> (9:1, 2 s)  | 16.26            | 0.80         | 55.4   | 7.21    |
| MeOH:CH <sub>2</sub> Cl <sub>2</sub> (9:1, 30 s) | 16.45            | 0.80         | 53.9   | 7.09    |
| MeOH:CH <sub>2</sub> Cl <sub>2</sub> (9:1, 60 s) | 16.77            | 0.80         | 51.8   | 6.96    |
| MeOH:CB (9:1, 2 s)                               | 17.33            | 0.80         | 56.0   | 7.76    |
| MeOH:CB (9:1, 30 s)                              | 17.31            | 0.80         | 53.6   | 7.42    |
| MeOH:CB (9:1, 60 s)                              | 17.48            | 0.80         | 51.4   | 7.19    |

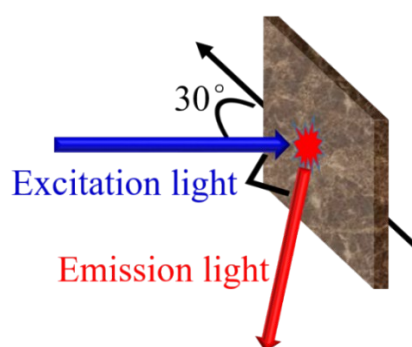

Figure S2 The schematic beam path of PL emission measurement

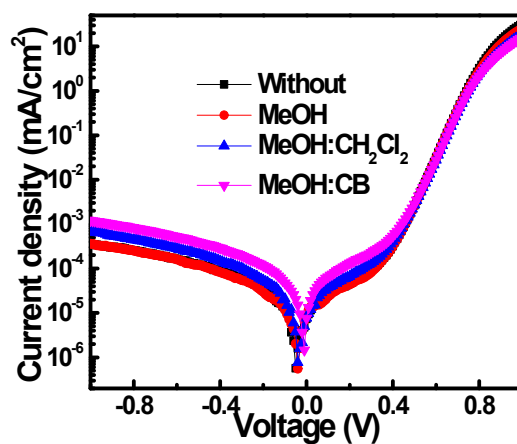

Figure S3 The  $J$ - $V$  curves of PSCs without or with different solvents soaking treatment in dark conditions
